# Supplementary material for: Differences in Extracellular NAD+ and NMN Metabolism on the Surface of Vascular Endothelial Cells
Source: MDPI journal article supplement (doi:10.3390/biology11050675), 2022-04-27
Supplement: s1 [file s1]

## SUPPLEMENTARY MATERIAL

# Differences in extracellular NAD<sup>+</sup> and NMN metabolism on the surface of vascular endothelial cells

Patrycja Jablonska<sup>1</sup>, Paulina Mierzejewska<sup>1</sup>, Marta Tomczyk<sup>1</sup>, Patrycja Koszalka<sup>2</sup>, Marika Franczak<sup>1</sup>, Ada Kawecka<sup>1</sup>, Barbara Kutryb-Zajac<sup>1</sup>, Alicja Braczko<sup>1</sup>, Ryszard T. Smolenski<sup>1</sup> and Ewa M. Slominska<sup>1</sup> \*

- <sup>1</sup> Department of Biochemistry, Medical University of Gdansk, 80-211, Gdansk, Poland; patrycja.jablonska@gumed.edu.pl (P.J.); paulina.mierzejewska@gumed.edu.pl (P.M.); marta.tomczyk@gumed.edu.pl (M.T.); kaweckaada@gumed.edu.pl (A.K.); b.kutryb-zajac@gumed.edu.pl (B.K.Z.); alicja.braczko@gumed.edu.pl (A.B.); marika.franczak@gumed.edu.pl (M.F.); ryszard.smolenski@gumed.edu.pl (R.T.S.)
- <sup>2</sup> Institute of Medical Biotechnology and Experimental Oncology, Laboratory of Cell Biology and Immunology, Intercollegiate Faculty of Biotechnology University of Gdansk and Medical University of Gdansk, 80-211, Gdansk, Poland; patrycja.koszalka@gumed.edu.pl (P.K.);

## SUPPLEMENTAL FIGURES

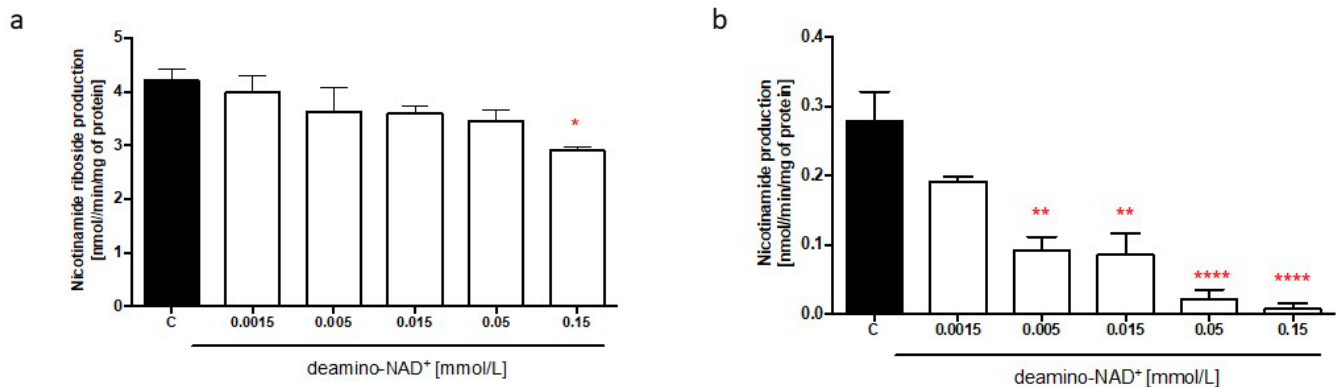

**Figure S1. Determination of the dose inhibiting the metabolism of NAD and NMN by deamino NAD.**

The effect of deamino-NAD<sup>+</sup> (nicotinamide hypoxanthine dinucleotide sodium salt) on nicotinamide (Nam) and nicotinamide riboside (NR) production during 120 min co-incubation with nicotinamide mononucleotide (NMN) on Eahy.926 cells. Results are shown as mean  $\pm$  SEM, n=3-5, \*\*\*\*p<0.0001; \*\*p<0.01; \*p<0.05

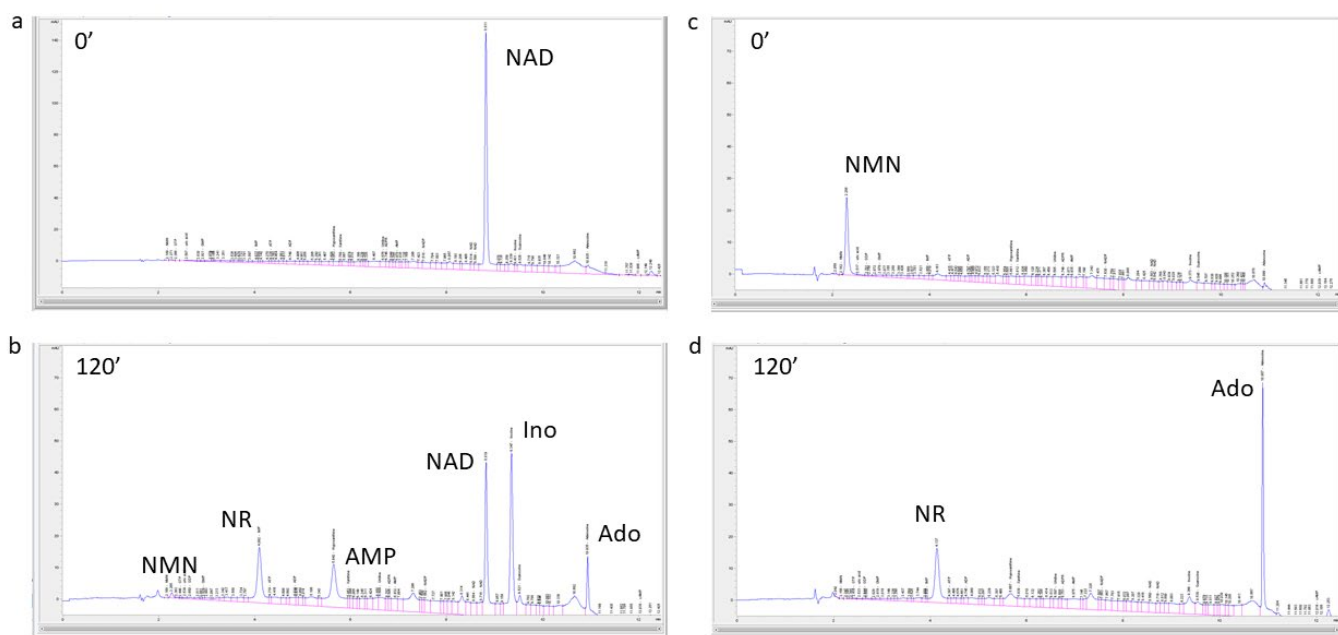

**Figure S2. Examples from the chromatographic analysis.** NAD hydrolysis at time 0' (Figure S2a) and after 120' minutes of incubation (Figure S2b) on PIEC CD73 cells. NMN hydrolysis at time 0 '(Figure S2c) and after 120' minutes of incubation (Figure S2d) on PIEC CD73 cells.
